## Characterization and expression QTL analysis of *TaABI4*, a pre-harvest sprouting related gene in wheat

1 **Chunsheng Xiao<sup>1\*</sup>, Yujiao Liu<sup>1\*</sup>, Wenshuai Chen<sup>1</sup>, Jian Yang<sup>1</sup>, Mengping Cheng<sup>1</sup>,**  
2 **Calum Watt<sup>2</sup>, Jingye Cheng<sup>2</sup>, Zhenzhong Wang<sup>3</sup>, Zhi Tan<sup>4</sup>, MaoLian Li<sup>1</sup>, Jirui**  
3 **Wang<sup>1,5†</sup>**

4

5 <sup>1</sup>Triticeae Research Institute, Sichuan Agricultural University, Chengdu 611130,

6 China

7 <sup>2</sup>Western Crop Genetic Alliance, Murdoch University, WA, 6150, Australia.

8 <sup>3</sup>China Rural Technology Development Center, Beijing 100045, China

9 <sup>4</sup> Food Safety Inspection Key Laboratory of Sichuan Province, 28 SS4 1<sup>st</sup> Ring Rd,

10 Chengdu, China

11 <sup>5</sup>State Key Laboratory of Crop Gene Exploration and Utilization in Southwest China,

12 Sichuan Agricultural University, Chengdu 611130, China

13

14 <sup>†</sup>Corresponding authors:

15 Prof. Jirui Wang, [wangjirui@gmail.com](mailto:wangjirui@gmail.com)

16

17 <sup>\*</sup>These authors have contributed equally to the study.

18

19

20 **Running Title:** Characterization and eQTL analysis of *TaABI4* in wheat

21

## 22 **Abstract**

23 Pre-harvest sprouting (PHS) induced by the decline of seed dormancy causes a severe  
24 reduction in crop yield and flour quality. In this study, we isolated and characterized  
25 *TaABI4*, an ABA-responsive transcription factor that participates in regulating seed  
26 germination in wheat. Sequence analysis revealed that *TaABI4* has three homologues,  
27 located on chromosomes 1A/1B/1D. *TaABI4* contains a conserved AP2 domain, and  
28 AP2-associated, LRP, and potential PEST motifs. Putative *cis*-acting regulatory  
29 elements (CE1-like box, W-box, ABRE elements, and RY-elements) were identified in  
30 the *TaABI4* promoter region that showed high conservation in 17 wheat cultivars and  
31 wheat-related species. Expression profiling of *TaABI4* indicated that it is a  
32 seed-specific gene accumulating during the middle stages of seed development.  
33 Transcript accumulation of *TaABI4* in wheat cultivar Chuanmai 32 (CM32, PHS  
34 susceptible) was 5.07-fold and 1.39-fold higher than that in synthetic hexaploidy  
35 wheat SHW-L1 (PHS resistant) at 15DPA and 20DPA, respectively. Six expression  
36 quantitative trait loci (eQTL) of *TaABI4* on chromosome 2A, 2D, 3B, and 4A were  
37 characterized based on the accumulated transcripts of *TaABI4* in SHW-L1 and CM32  
38 derived recombinant inbred lines. These QTLs explained from 10.7% to 46.1% of the  
39 trait variation with 4.53~10.59 of LOD scores, which contain genes that may affect  
40 the expression of *TaABI4*.

41 **Keywords:** *cis*-acting regulatory; eQTL analysis; PHS; *TaABI4*; Wheat; RT-qPCR;  
42 seed dormancy;

43

## 44 **Introduction**

45 Pre-harvest sprouting (PHS) is the germination of mature grains in the spike when  
46 there is excessive moisture before harvest. PHS has become a recurring worldwide  
47 problem since it causes a severe reduction in crop yield and flour quality due to starch  
48 and protein degradation (Olaerts et al., 2016). Seed dormancy accounts for up to 60%  
49 of the variation in PHS tolerance, and PHS in wheat is mainly caused by the lack of  
50 adequate seed dormancy (DePauw and McCaig, 1991; Li et al., 2004). The level of  
51 wheat grain dormancy partly depends on ABA sensitivity before and after the grain  
52 reaches physiological maturity (Gubler et al., 2005; Shu et al., 2016; Sun et al., 2005).  
53 One well-characterized positive regulator of ABA signalling, *ABI4*, was initially  
54 identified in screens for mutants exhibiting ABA-resistant germination (Finkelstein,  
55 1994). *ABI4* is a member of the AP2/ERF transcription factor family and can activate

56 or repress gene expression by binding to specific *cis*-elements in gene promoters via  
57 its APETALA 2 (AP2) DNA-binding domain (Wind et al., 2013). It has been  
58 documented that *ABI4* interacts with target genes to regulate seed dormancy and  
59 germination. For example, *ABI4*-dependent temporal regulation of *PTR2* expression  
60 influences water status during seed germination, promoting germination of imbibed  
61 grain (Choi et al., 2020). *ABI4* is indispensable for repressing the expression of  
62 *ARR6/7/15*, which is involved in seed dormancy (Huang et al., 2017). Moreover, *ABI4*  
63 is a primary positive regulator of *ABI4*, *ABI5*, and *SBE2.2*, activating transcription by  
64 binding the CACCG-box (CE1-like) in the promoter regions during seed development  
65 (Bossi et al., 2009). Apart from *ABI4* itself, various transcription factors could  
66 regulate *ABI4* transcription, including several *WRKY* transcription factors that can  
67 bind to the W-box sequence in the *ABI4* promoter region (Antoni et al., 2011; Liu et  
68 al., 2012; Shang et al., 2010). *Myb96* induces *ABI4* expression by binding to its  
69 promoter during seed germination and seedling development (Lee and Seo, 2015).

70 In addition to *ABI4*, two other transcription factors (*ABI3/VP1* and *ABI5*) have been  
71 characterized that regulate ABA response during seed development (Finkelstein, 1994;  
72 Finkelstein and Lynch, 2000). It has been reported that some cross-regulation of  
73 expression existed among *ABI3*, *ABI4*, and *ABI5*, whose function in a combinatorial  
74 network, rather than a regulatory hierarchy, controlling seed development and ABA  
75 response (Soderman et al., 2000). Moreover, *ABI3*, *ABI4*, *ABI5* have similar effects on  
76 seed dormancy and the expression of maturation-specific seed proteins (Finkelstein,  
77 1994). However, *ABI4* is a focal point in the signal transduction pathways of ABA  
78 (Niu et al., 2002). Orthologues of *ABI4* have been reported in many other plant  
79 species, including maize, rice, and lotus (Ming et al., 2013; Niu et al., 2002; Wang et  
80 al., 2015). In maize, *ZmABI4* is seed-specific, reaching maximum expression at 20  
81 days post-anthesis (DPA) (Niu et al., 2002). In the rice database, a single sequence  
82 shares significant homology with the *AtABI4* AP2 domain, indicating that a single  
83 *ABI4* homolog exists in rice (Yu et al., 2002). However, there is limited information  
84 available for *ABI4* orthologues in wheat.

85 Synthetic hexaploid wheat SHW-L1 obtained from the hybridization of *Triticum*  
86 *turgidum* and *Aegilops tauschii* is a useful genetic resource and shows significant  
87 tolerance to PHS (Yang et al., 2014). To investigate the regulatory factors that interact  
88 with *TaABI4* and the role of *TaABI4* in the ABA-induced seed dormancy pathway, we  
89 performed a conservation analysis on *ABI4* in wheat ancestral species and modern

90 cultivars and subsequently cloned this gene. We analysed the expression pattern of  
91 *TaABI4* at different grain developmental stages. Furthermore, we carried out  
92 expression QTL analysis (eQTL) to detect regions regulating the expression of *TaABI4*  
93 in recombinant inbred lines (RILs), providing further insight into the role of *TaABI4* in  
94 ABA signal transduction pathways and into the regulatory framework that controls  
95 seed germination in wheat.

96

## 97 **Materials and methods**

### 98 *Plant material*

99 Chuanmai32 (CM32, PHS susceptible), synthetic hexaploid wheat (SHW-L1, PHS  
100 resistant), and their derived RILs (138 lines) were grown in glasshouse conditions  
101 (16-h light, 8-h dark, 22 °C, 70% relative humidity). Days to flowering was measured  
102 for each spikelet based on the anther extrusion at 50% of the spike. Developing grains  
103 from 5 days post-anthesis (DPA) to 30DPA were collected at five-day intervals from  
104 the centre florets for subsequent gene expression profiling. Young leaves of SHW-L1  
105 and CM32 were used for DNA extraction. Each sample had biological replicates and  
106 was immediately frozen into liquid nitrogen and stored at -80°C for RNA extraction.

### 107 *Sequence characterization and in-silico promoter analysis*

108 Based on the results of BLASTP searches, we obtained coding sequences of *TaABI4*  
109 in Chinese Spring using EnsemblPlants (<http://plants.ensembl.org/index.html>). Protein  
110 domains of genes were predicted using the SMART tool  
111 (<http://smart.embl-heidelberg.de/>). The coding sequences of *TaABI4* were used to  
112 query the target database (ViroBLAST, <http://202.194.139.32/blast/viroblast.php>, and  
113 The Wheat 'Pan Genome', <http://www.10wheatgenomes.com/data-repository/>, The  
114 *Aegilops tauschii* genome, <http://aegilops.wheat.ucdavis.edu/ATGSP/data.php>) to  
115 download homologous genes and 2 kb upstream sequences from translational  
116 initiation codon in 17 wheat cultivars and three wheat ancestors (Altschul et al., 1997;  
117 Ling et al., 2018; Luo et al., 2017; Zhu et al., 2019)(**Table S1**).

118 Amino acid sequences were aligned using DNAMAN (Version. 5.2.10, Lynnon  
119 Biosoft, Quebec, Canada). Putative *cis*-acting regulatory elements located in promoter  
120 regions were predicted using PLANTCARE (Lescot et al., 2002)  
121 (<http://bioinformatics.psb.ugent.be/webtools/plantcare/html/>) and PLACE (Higo et al.,  
122 1999) (<http://www.dna.affrc.go.jp/PLACE/>). The analysis of conserved motifs in 17  
123 wheat cultivars was obtained using the MEME suite (Bailey et al., 2009)

124 (<http://meme-suite.org/tools/meme>). This program was used to search for the top 5  
125 *cis*-motifs with consensus patterns of 6~50 base width and E-value < 0.01, on the  
126 forward strand of the input sequences only.

### 127 ***Prediction of proteins and PEST motifs***

128 Generated coding sequences were translated to predicted proteins using DNAMAN  
129 with default parameters. Searches for potential PEST sequences were performed using  
130 the ePESTfind (<http://www.bioinformatics.nl/cgi-bin/emboss/epestfind>). We used the  
131 input parameters in all cases and defined that a score above zero denoted a possible  
132 PEST sequence (Gregorio et al., 2014).

### 133 ***PCR amplification***

134 According to *TaABI4* nucleotide sequences of Chinese Spring, specific primers for the  
135 gene were designed online (<https://www.ncbi.nlm.nih.gov/tools/primer-blast/>) and  
136 shown in **Table S2**. Genomic DNA was isolated from SHW-L1/CM32 young leaves  
137 using the CTAB method (Zhang et al., 2013) and was used as templates to amplify the  
138 DNA sequences of *TaABI4*. PCR was performed using high-fidelity Prime STAR  
139 Polymerase (TaKaRa, Japan) under the following conditions: 98 °C for 3 min; 35  
140 cycles of 98 °C for 50 s, 60-65 °C for 50 s, and 72 °C for 90 s; followed by a final  
141 extension step of 72 °C for 10 min. The PCR amplification products were ligated into  
142 the pEASY-blunt Cloning Vector (TransGen, China), and the resulting ligation  
143 mixtures were transformed into *E.coli* Trans1-T1 chemically competent cells  
144 (TransGen, China) to obtain positive clones for sequencing.

### 145 ***RNA extraction and expression analysis***

146 Primer pairs in the relevant conserved exon regions of *TaABI4* among A, B, and D  
147 genomes in SHW-L1 and CM32 were used to amplify 151 bp amplicons (**Table S2**).  
148 The expression level of *TaABI4* was measured in the parents at six seed development  
149 stages (5, 10, 15, 20, 25, and 30DPA). RNA was extracted from each sample using the  
150 total RNA extraction kit (Biofit, China), and genomic DNA was removed with  
151 DNaseI.

152 Three seed-developing stages (10DAP, 20AP, 30DAP) of SHW-L1/CM32 were  
153 selected to carry out RNA sequencing (RNAseq). RNA quantity and quality were  
154 assessed using a NanoDrop 2000 spectrophotometer (Thermo Scientific, USA) and  
155 checked for integrity on an Agilent 2100 bioanalyser (Agilent Technologies, USA) by  
156 denaturing agarose gel electrophoresis with ethidium bromide staining. Equimolar  
157 amounts of the libraries were constructed and sequenced by BerryGenomics (Beijing)

158 using the Illumina HiSeq-2000 and HiSeq X Ten platform (Illumina, USA). Gene  
159 transcript levels were estimated using transcripts per million (TPM) (Zhao et al.,  
160 2020).

161 First-strand cDNA was synthesized using a PrimeScript™ 1st Strand cDNA  
162 Synthesis Kit (Takara). cDNA sampling was performed in duplicate and SsoFast™  
163 EvaGreen® Supermix (Bio-Rad) used for real-time quantitative PCR (RT-qPCR)  
164 (CFX96 Touch™ Real-Time PCR Detection System, Bio-Rad, USA). Each reaction  
165 contained approximately 50ng first-strand cDNA, 0.5 μL 10 μmol/L gene-specific  
166 primers, and 10 μL real-time PCR SYBR Green (TIANGEN, Beijing, China).  
167 Amplification conditions were: 5 min at 95°C, followed by 40 cycles of 30 s at 95°C,  
168 30 s at 60°C, 40 s at 72°C, and a final extension of 10 min at 72°C. Seven 1/10  
169 dilutions of the recombinant plasmid cDNA template were used to make a standard  
170 curve for amplification efficiency (E) calculation. Three housekeeping genes, *TaActin*,  
171 *Ta.14126.1*, and *Ta.7894.3.a1\_at*, were used as internal controls (Long et al., 2010).  
172 Gene expression data were analysed using the Bio-Rad CFX Manager (Bio-Rad)  
173 software. The expression profile of the target gene was normalized to that of the  
174 internal control genes, and the geometric mean was calculated. The relative gene  
175 expression quantity of each sample was calculated using the  $E^{-\Delta\Delta C_t}$  method (Pfaffl,  
176 2001).

### 177 ***Expression QTL (eQTL) analysis***

178 In order to characterize regions that regulate *TaABI4* expression levels, we conducted  
179 eQTL mapping analysis within the RIL population using the previously constructed  
180 high-density genetic map (Yang et al., 2019). eQTL analysis was achieved using the  
181 WinQTLcart2.5 software (North Carolina State University, Raleigh, NC, USA) with  
182 the composite interval mapping (CIM) method (Wang and Basten, 2007). The analysis  
183 was implemented by setting the control parameters to model 6 (standard model),  
184 forward regression, 10-cm windows, and five makers as the control. The threshold  
185 was set at 4.0 to detect eQTLs. The wheat reference genome “Chinese Spring,”  
186 IWGSC RefSeq v1.0 (International Wheat Genome Sequencing Consortium 2018)  
187 was used to query marker positions using the blastn2.2.26+ package (Camacho et al.  
188 2009).

189

## 190 **Results**

### 191 ***Sequence characterization of TaABI4***

192 The DNA sequence of *ABI4* (AT2G40220) from *Arabidopsis* was used as a query  
193 sequence to carry out BLAST searches in EnsemblPlants. Three homologues of  
194 *TaABI4* were identified on the A, B, and D sub-genomes of 18 wheat cultivars  
195 (*TaABI4-1A*, *TaABI4-1B*, *TaABI4-1D*). All the 50 *TaABI4* sequences were found to be  
196 represented by a single exon. The coding sequences (CDS) of three homologues of  
197 Chinese Spring were conserved with 97.53% nucleotide identity. Compared to  
198 *TaABI4-1A*, *TaABI4-1B* and *TaABI4-1D* had two 3-6 bp deletions as well as 28  
199 single-nucleotide polymorphisms (SNPs), 13 SNPs of which caused non-synonymous  
200 mutations (**Fig. S1**). The three homologues encoded proteins with 260, 256, and 257  
201 amino acid residues, respectively. The proteins have highly conserved AP2 domains  
202 that were also found in previously annotated *AtABI4* in *Arabidopsis* and *ZmABI4* in  
203 maize (*Zea mays*) (**Fig. 1**). In addition, ten amino acids (KGGPENAKFR) were  
204 contiguous to the AP2 domain (designated as the AP2-associated motif). Additionally,  
205 a stretch of eight amino acids (LRPLLPRP) identified as the LRP motif was located  
206 nearby. (**Fig. 1**). *TaABI4* proteins revealed 100% identity in these common regions,  
207 while *TaABI4-1A* contained three additional amino acids His<sub>171</sub>, Leu<sub>196</sub>, and Ala<sub>197</sub>  
208 (**Fig. 1**). Putative proteins were predicted from *Ae. tauschii*, *T. dicoccoides* cv.  
209 *Zavitan* and *T. urartu*. The protein sequence of *AetABI4* obtained from *Ae. tauschii*  
210 illustrated 100% identity with *TaABI4-1D* sequence. *TuABI4-1A* obtained from *T.*  
211 *urartu*, showed 99.23% amino acid identity with *TaABI4-1A*. *TdABI4-1B* of *T.*  
212 *dicoccoides* cv. *Zavitan* shared 98.08% identity with *TaABI4-1B* (**Fig. 1**).

### 213 ***ABI4 proteins and putative motifs analysis in wheat cultivars***

214 The AP2 domains, the AP2-associated motifs, and the LRP motifs were conserved in  
215 50 putative *ABI4* homologous proteins in terms of their position and sequence identity  
216 (**Fig. 2**). Putative PEST degradation signals at the terminus of wheat *ABI4* proteins  
217 with a positive probability value (>0) were detected using the PEST-find program  
218 (Rice et al., 2000), which was in agreement with a previous report (Gregorio et al.,  
219 2014). It demonstrated that potential PEST sequences were detected in all of these  
220 proteins, with probability scores ranging from +0.44 (*ABI4-1A*) to +3.52 (*ABI4-1B*)  
221 (**Table 1**). For *ABI4-1B* and *ABI4-1D* proteins, one PEST sequence was detected at  
222 the C-terminal with a length of 60AA. For *ABI4-1A* proteins, a shorter PEST motif of

223 41 amino acids was detected, sharing 99.8% identity amongst the 17 cultivars in  
224 addition to another PEST sequence predicted at the N-terminus that was also  
225 identified in TaABI4-1B. Although some variant amino acids were detected in  
226 proteins of each genome, as shown in grey boxes in **Fig. 2**, they did not locate in the  
227 region of crucial motifs. It demonstrates that the ABI4 proteins are conserved in their  
228 protein architecture, coinciding with their central role in wheat hormone signalling.

### 229 ***Potential cis-acting regulatory elements of ABI4 promoters in wheat ancestors***

230 The presence of potential *cis*-regulatory elements at upstream ( $\geq 2,000$  bp) region of  
231 *TaABI4* homologues from wheat cultivar Chinese Spring was analysed. Eleven types  
232 of potential *cis*-acting regulatory elements were identified in the upstream region (**Fig.**  
233 **3**). This region was also isolated from *T. dicoccoides* cv. Zavitan, *T. urartu*, and *Ae.*  
234 *tauschii*. A putative TATA-box was detected 190 bp upstream of the start codon. A  
235 binding site (CE1-like motif, CACCGCCCC) was present immediately downstream  
236 from a putative W-box (TTGACY). In addition, RY-elements with CATGCATG  
237 involved in seed-specific regulation were predicted. ABRE elements known to be  
238 involved in ABA response, with CACGTG core motif, were recognized nearby the 5'  
239 termini. ARE elements with an AAACCA core motif that are essential for the  
240 anaerobic induction also existed in all ABI4 proteins. Additionally, conserved motifs  
241 such as CAAT box, CAT box, and A box were detected. One Myb and one Myc  
242 element, known to be involved in ABA signalling (Lin, 2009), were predicted in  
243 *TaABI4-1D* and *AetABI4* promoter regions. The detected *cis*-acting regulatory  
244 elements were conserved among the wheat and its ancestral species.

### 245 ***The putative motifs analysis of ABI4 genes in wheat cultivars***

246 The top five motifs identified by this analysis were found in almost all of the *ABI4*  
247 genes in wheat cultivars and were highly conserved in terms of number and position  
248 (**Fig. 4**). Although motif two did not exist in the A sub-genome of Kronos, it shared  
249 99.4% identity among 50 upstream regions and was regarded as a novel *cis*-motif with  
250 no current description in the PLACE database (**Table 2**). As shown in **Table 2**, motif  
251 1 with a W-box as its core element was also conserved in all sequences with 100%  
252 identity. Although there were some variable SNPs in motif 3, motif 4, and motif 5,  
253 they did not exist in the core region of each motif. Overall, putative motifs within the  
254 upstream of *ABI4* genes were almost completely conserved in wheat cultivars.

### 255 ***Cloning and qRT-PCR analysis of TaABI4 in SHW-L/CM32 developing seeds***

256 The *TaABI4* sequences were cloned from SHW-L and CM32, which were highly



257 conserved in these two cultivars (**Fig. S2**). According to RNAseq analysis, the  
258 expressional level of *TaABI4* in CM32 was higher than that in SHW-L1 at each  
259 detected stage (**Fig. 5A**). Then, RT-qPCR assays were performed using cDNA from  
260 five-time points (5, 15, 20, 25, and 30DPA) to detect expression level variation of  
261 *TaABI4* between SHW-L1 and CM32. During seed development, *TaABI4* expression  
262 began as early as 10DPA, increasing between 10DPA and 15DPA as the transition  
263 from growth to storage phase of grain development (starting after 12DPA) took place,  
264 and peaked at 20DPA with a decline in expression until 30DPA. The expression of  
265 *TaABI4* in CM32 was higher than that in SHW-L1 in most of the measured stages.  
266 The two most significant differences in relative expression were detected at 15DPA  
267 (5.07-fold) and 20DPA (1.39-fold) (**Fig. 5B**).

### 268 *Expression QTL mapping*

269 The significant difference between CM32 and SHW-L1 in expression levels of  
270 *TaABI4* at 15 and 20DPA enabled the detection of eQTLs. Based on the consensus  
271 genetic map and corresponding SNP marker positions, six significant eQTLs ( $P < 0.05$ ,  
272  $LOD > 4$ ) were identified (Table 3; Fig.6). One eQTL detected on chromosome 2A at  
273 15DPA was designated as *eQABI4.15DPA.2A.1*, with LOD scores at 4.53. Two eQTL  
274 regions located on chromosome 2D designated as *eQABI4.20DPA.2D.1* and  
275 *eQABI4.20DPA.2D.2* were detected at 20DPA, showing 9.63 and 6.38 LOD scores,  
276 respectively. *eQABI4.20DPA.4A.1* and *eQABI4.20DPA.4A.2* were located on  
277 chromosome 4D with negative alleles from SHW-L1, they explained 38.2% and  
278 46.1% of the phenotypic variation, respectively. Physical mapping of 3B eQTL,  
279 designated as *eQABI4.20DPA.3B.1*, showing that the corresponding interval location  
280 was Chr.3B: 667902308-669428443. All identified eQTLs had negative additive  
281 effects, indicating that eQTLs that could decrease expression of *TaABI4* were derived  
282 from synthetic wheat SHW-L1.

283

### 284 **Discussion**

285 In this study, we presented the characterization of the wheat *ABI4*, a gene involved in  
286 ABA-responsiveness during seed development and germination. *TaABI4* proteins  
287 from three wheat sub-genomes were conserved with an AP2 domain required for  
288 nuclear localization (AP2-associated motif), as well as regions for transcriptional  
289 activation (LRP motif). The conserved domains are used as hallmarks to identify  
290 *ABI4* orthologues in different species (Gregorio et al., 2014). Although the protein

291 sequences for the three homologues had slight polymorphisms, the overall identity  
292 was high (96.9%). Our results suggested that the AP2 proteins presented in wheat are  
293 the orthologues of the *Arabidopsis* ABI4 and should be considered as TaABI4-1A,  
294 TaABI4-1B, TaABI4-1D.

295 Compared with the ABI4 obtained from *T. urartu*, *Ae. tauschii* and *T. dicoccoides*,  
296 the amino acid variation existed only in TaABI4-1A (Thr<sub>15</sub>/Leu<sub>15</sub>, Gly<sub>218</sub>/Arg<sub>218</sub>) and  
297 TaABI4-1B (Ser<sub>108</sub>/Pro<sub>108</sub>) and were not located in core regulatory regions (**Fig. 1**). It  
298 was indicating that TaABI4 was highly conserved during the polyploidization and  
299 domestication processes of wheat. In *Arabidopsis*, the low accumulation of ABI4  
300 resulted from both post-transcriptional and post-translational regulation (Finkelstein et  
301 al., 2011). PEST sequences are degradation motifs that can affect protein stability  
302 (Gregorio et al., 2014) and are characterized by regions enriched in the amino acid  
303 proline, glutamic acid, serine, and threonine (Rogers et al., 1986). Based on the  
304 available pan-genome data, we analysed 50 putative ABI4 proteins from 18 wheat  
305 cultivars to predict potential PEST motifs. Most of the possible PEST sequences were  
306 located in the N-terminal region of the protein and were longer than AtABI4 (**Table 1**).  
307 These differences may cause divergence in post-translational mechanisms compared  
308 with *Arabidopsis*. In fact, ZmABI4 also has two PEST motifs located in the  
309 N-terminus and C-terminus showing score values of +3.04 and +0.68, respectively  
310 (Gregorio et al., 2014).

311 The discovery of *cis*-acting regulatory elements in the promoter regions is essential  
312 to understanding the spatial and temporal expression patterns of *ABI4* genes. The six  
313 *cis*-acting regulatory elements were conserved in terms of position and sequence  
314 identify (**Fig. 3**). TATA-box is regarded as the core promoter element, and  
315 transcription factors bind to TATA-proximal regions (W-box, CE-1 like) having been  
316 shown to regulate downstream gene transcription (Busk et al., 1997; Heins et al., 1992;  
317 Phukan et al., 2016). Additionally, A-box and RY-element are *cis*-acting regulatory  
318 elements, and CAT-box is related to meristem expression in *Arabidopsis* (Sakata et al.,  
319 2010). ABRE (ABA-responsive elements) motifs are known to participate in response  
320 to ABA (Sarkar and Lahiri, 2013). *TaABI4-1D* contained two classical ABRE  
321 elements that are necessary to constitute an active ABA-responsive complex because  
322 a single ABRE is not sufficient to confer ABA-responsiveness (Ganguly et al., 2011;  
323 Hobo et al., 1999; Zhang et al., 2005). Identification of conserved *cis*-acting  
324 regulatory elements in *ABI4* promoters of wheat revealed that other transcription

325 factors might regulate those homologues.

326 The expression pattern of *TaABI4* was variable between a modern wheat cultivar  
327 and synthetic wheat accession. It is noteworthy that *TaABI4* showed higher transcript  
328 accumulation in weakly dormant material (CM32) than in dormant material (SHW-L1)  
329 during most periods of seed development (**Fig. 5**). By contrast, seeds of the  
330 *Arabidopsis abi4* mutant germinated significantly more quickly than wild type (Shu et  
331 al., 2013), indicating the presence of functional *ABI4* is important for resistance to  
332 PHS. The expression of *TaABI3* and *TaABI5* in SHW-L1 were both significantly  
333 higher than those in CM32 (Zhou et al., 2016). These results are consistent with the  
334 corresponding research results in *Arabidopsis* and maize finding *ABI3* and *ABI5* are  
335 positive regulators of seed dormancy (Finkelstein and Lynch, 2000; Hoecker et al.,  
336 1995; McCarty et al., 1991). Gene expression patterns of *TaABI3* and *TaABI5* were  
337 similar to *TaABI4* in the early and middle stages of seed development (5~15DPA),  
338 signifying that *TaABI4* associating the ABA biosynthetic pathway with *TaABI3* and  
339 *TaABI5* as found in *Arabidopsis* (Lopez-Molina et al., 2002). From these results, other  
340 regulatory factors interacting with *TaABI4* are required to complete our understanding  
341 of the gene networks involving seed germination.

342 eQTLs mapping is an efficient approach to identify genetic loci controlling  
343 complex crop traits (Chen et al., 2010; Motomura et al., 2013). In this study, six  
344 significant eQTLs associated with *TaABI4* expression variation were identified on  
345 chromosomes 2A, 2D, 3B, and 4A (**Table 3**), suggesting that the observed differences  
346 in *TaABI4* expression in the RILs population were regulated in-part by *trans*-acting  
347 factors (Doss et al., 2005). Several previous studies mapped the major QTLs for seed  
348 dormancy and PHS tolerance to chromosomes 4A (Mares et al. 2005; Torada et al.  
349 2005; Chen et al. 2008). In this study, two major eQTLs located on chromosome 4A  
350 accounted for 38.2 and 46.1% of the phenotypic variance. This result further  
351 confirmed that the eQTLs on chromosome 4A control the expression of *TaABI4* to  
352 regulate seed germination in wheat. Some QTLs associated with the PHS were also  
353 detected on chromosome 2D. For instance, *QPhs.cnl-2D.1* is mapped for PHS  
354 resistance in white wheat (Munkvold et al, 2009). These results suggest that these  
355 eQTL regions detected in this study may provide candidate genes that play potential  
356 roles in regulating PHS through effects on *TaABI4* expression. *TaABI5* that reported as  
357 pre-harvest sprouting resistance gene (Zhou et al., 2016) was located near the  
358 *eQABI4.20DPA.3B.1* (<30Mb), signifying that *TaABI5* might regulate the expression

359 of *TaABI4* in SHW-L1 and CM32. Thus, new eQTLs detected in this study suggested  
360 that unidentified genes or indirect regulation genes would affect *TaABI4*, which  
361 causes the different expression patterns of *TaABI4* compared with *Arabidopsis*.

362 In this study, the characterization of *TaABI4*, including its conserved protein  
363 domains and *cis*-acting regulatory elements analysis, provides information on the  
364 critical nucleotide and amino acid residues of this gene. Meanwhile, high  
365 conservation in amino acid sequences and promoter regions, but the different  
366 expression level of *TaABI4* in two wheat cultivars drove us to identify regions linked  
367 to candidate genes that function upstream of *TaABI4* transcripts. Six potential eQTL  
368 regions that may regulate the expression of *TaABI4* were detected. These results can  
369 be utilized for future *TaABI4* studies on interactions with other transcription factors in  
370 response to ABA and establishment of the co-expressed networks relating to seed  
371 germination, which will successfully boost the efficiency of wheat breeding with  
372 sufficient seed dormancy to prevent PHS.

373

374 **Acknowledgments.** We thank Dr. Jizeng Jia from the Chinese Academy of  
375 Agricultural Science to provide the data of Aikang58.

376

377 **Financial support.** This research was supported by the National Key Research and  
378 Development Program of China (2018YFE0112000; 2017YFD0100900), the National  
379 Natural Science Foundation of China (31871609; 91935303), and the Sichuan Science  
380 and Technology Support Project (2018HH0126; 2019YFN0141).

381

382 **Declare of conflict interest.** The authors declare no conflicts of interest.

383

## 384 Reference

385 Altschul, S.F., Madden, T.L., Schäffer, A.A., Zhang, J., Zhang, Z., Miller, W. and Lipman, D.J. (1997)  
386 Gapped BLAST and PSI-BLAST: a new generation of protein database search programs. *Nucleic Acids*  
387 *Res.* **25**, 3389-3402.

388 Antoni, R., Rodriguez, L., Gonzalez-Guzman, M., Pizzio, G.A. and Rodriguez, P.L. (2011) News on ABA  
389 transport, protein degradation, and *ABFs/WRKYs* in ABA signaling. *Curr Opin Plant Biol.* **14**, 547-553.

390 Bailey, T.L., Boden, M., Buske, F.A., Frith, M., Grant, C.E., Clementi, L., Ren, J., Li, W.W. and Noble,  
391 W.S. (2009) MEME SUITE: tools for motif discovery and searching. *Nucleic Acids Res.* **37**, W202-208.

392 Bossi, F., Cordoba, E., Dupré, P., Mendoza, M.S., Román, C.S. and León, P. (2009) The *Arabidopsis*  
393 ABA-INSENSITIVE (ABI) 4 factor acts as a central transcription activator of the expression of its own  
394 gene, and for the induction of *ABI5* and *SBE2.2* genes during sugar signaling. *Plant J.* **59**, 359-374.

- 395 **Busk, P.K., Jensen, A.B. and Pagès, M.** (1997) Regulatory elements in vivo in the promoter of the  
396 abscisic acid responsive gene *rab17* from maize. *Plant J.* **11**, 1285-1295.
- 397 **Camacho C, Coulouris G, Avagyan V, Ma N, Papadopoulos J, Bealer K, Madden TL.** (2009) BLAST+:  
398 architecture and applications. *BMC Bioinformatics.* **10**, 421.
- 399 **Chen, X., Hackett, C.A., Niks, R.E., Hedley, P.E., Booth, C., Druka, A., Marcel, T.C., Vels, A., Bayer, M.,**  
400 **Milne, I., Morris, J., Ramsay, L., Marshall, D., Cardle, L. and Waugh, R.** (2010) An eQTL analysis of  
401 partial resistance to Puccinia hordei in barley. *PLoS one.* **5**, e8598.
- 402 **Chen, C., Cai, S. & Bai, G.** (2008) A major QTL controlling seed dormancy and pre-harvest sprouting  
403 resistance on chromosome 4A in a Chinese wheat landrace. *Mol Breeding.* **21**, 351–358.
- 404 **Choi, M.-G., Kim, E.J., Song, J.-Y., Choi, S.-B., Cho, S.-W., Park, C.S., Kang, C.-S. and Park, Y.-I.** (2020)  
405 Peptide transporter2 (PTR2) enhances water uptake during early seed germination in *Arabidopsis*  
406 *thaliana*. *Plant Molecular Biology.* **102**, 615-624.
- 407 **DePauw, R.M. and McCaig, T.N.** (1991) Components of variation, heritabilities and correlations for  
408 indices of sprouting tolerance and seed dormancy in *Triticum spp.* *Euphytica.* **52**, 221-229.
- 409 **Doss, S., Schadt, E.E., Drake, T.A. and Lusk, A.J.** (2005) *Cis*-acting expression quantitative trait loci in  
410 mice. *Genome Res.* **15**, 681-691.
- 411 **Finkelstein, R., Lynch, T., Reeves, W., Petitfils, M. and Mostachetti, M.** (2011) Accumulation of the  
412 transcription factor ABA-insensitive (ABI)4 is tightly regulated post-transcriptionally. *Journal of*  
413 *Experimental Botany.* **62**, 3971-3979.
- 414 **Finkelstein, R.R.** (1994) Mutations at two new *Arabidopsis* ABA response loci are similar to the *abi3*  
415 mutations. *The Plant Journal.* **5**.
- 416 **Finkelstein, R.R. and Lynch, T.J.** (2000) The *Arabidopsis* abscisic acid response gene *ABI5* encodes a  
417 basic leucine zipper transcription factor. *Plant Cell.* **12**, 599-609.
- 418 **Ganguly, M., Roychoudhury, A., Sarkar, S.N., Sengupta, D.N., Datta, S.K. and Datta, K.** (2011)  
419 Inducibility of three salinity/abscisic acid-regulated promoters in transgenic rice with gusA reporter  
420 gene. *Plant Cell Rep.* **30**, 1617-1625.
- 421 **Gregorio, J., Hernandez-Bernal, A.F., Cordoba, E. and Leon, P.** (2014) Characterization of  
422 evolutionarily conserved motifs involved in activity and regulation of the ABA-INSENSITIVE (ABI) 4  
423 transcription factor. *Mol Plant.* **7**, 422-436.
- 424 **Gubler, F., Millar, A.A. and Jacobsen, J.V.** (2005) Dormancy release, ABA and pre-harvest sprouting.  
425 *Curr Opin Plant Biol.* **8**, 183-187.
- 426 **Heins, L., Frohberg, C. and Gatz, C.** (1992) The Tn10-encoded Tet repressor blocks early but not late  
427 steps of assembly of the RNA polymerase II initiation complex in vivo. *Mol Gen Genet.* **232**, 328-331.
- 428 **Higo, K., Ugawa, Y., Iwamoto, M. and Korenaga, T.** (1999) Plant cis-acting regulatory DNA elements  
429 (PLACE) database: 1999. *Nucleic Acids Res.* **27**, 297-300.
- 430 **Hobo, T., Asada, M., Kowiyama, Y. and Hattori, T.** (1999) ACGT-containing abscisic acid response  
431 element (ABRE) and coupling element 3 (CE3) are functionally equivalent. *Plant J.* **19**, 679-689.
- 432 **Hoecker, U., Vasil, I.K. and McCarty, D.R.** (1995) Integrated control of seed maturation and  
433 germination programs by activator and repressor functions of Viviparous-1 of maize. *Genes Dev.* **9**,  
434 2459-2469.
- 435 **Huang, X., Xiaoyan, Z., Zhizhong, G., Shuhua, Y. and Yiting, S.** (2017) *ABI4* represses the expression of  
436 type-A ARR1s to inhibit seed germination in *Arabidopsis*. *The Plant Journal.* **89**(2), 354-365.
- 437 **International Wheat Genome Sequencing Consortium.** (2018) Shifting the limits in wheat research  
438 and breeding through a fully annotated and anchored reference genome sequence. *Science.*

- 439 **361**(6403), eaar7191.
- 440 **Jordan, M.C., Somers, D.J. and Banks, T.W.** (2007) Identifying regions of the wheat genome controlling  
441 seed development by mapping expression quantitative trait loci. *Plant Biotechnol J.* **5**, 442-453.
- 442 **Lee, H.G. and Seo, P.J.J.P.J.** (2015) The MYB96-HHP module integrates cold and abscisic acid signaling  
443 to activate the CBF-COR pathway in *Arabidopsis*. **82**, 962-977.
- 444 **Lescot, M., Déhais, P., Thijs, G., Marchal, K., Moreau, Y., Van de Peer, Y., Rouzé, P. and Rombauts, S.**  
445 (2002) PlantCARE, a database of plant cis-acting regulatory elements and a portal to tools for in silico  
446 analysis of promoter sequences. *Nucleic Acids Res.* **30**, 325-327.
- 447 **Li, C., Ni, P., Francki, M., Hunter, A., Zhang, Y., Schibeci, D., Li, H., Tarr, A., Wang, J., Cakir, M., Yu, J.,**  
448 **Bellgard, M., Lance, R. and Appels, R.** (2004) Genes controlling seed dormancy and pre-harvest  
449 sprouting in a rice-wheat-barley comparison. *Funct Integr Genomics.* **4**, 84-93.
- 450 **Lin, Y.** (2009) Isolation and Analysis of Glucose-6-phosphate Dehydrogenase(G6PDH) Promoter from  
451 Poplar. *Genomics&Applied Biology*.
- 452 **Ling, H.Q., Ma, B., Shi, X., Liu, H., Dong, L., Sun, H., Cao, Y., Gao, Q., Zheng, S., Li, Y., Yu, Y., Du, H., Qi,**  
453 **M., Li, Y., Lu, H., Yu, H., Cui, Y., Wang, N., Chen, C., Wu, H., Zhao, Y., Zhang, J., Li, Y., Zhou, W., Zhang,**  
454 **B., Hu, W., van Eijk, M.J.T., Tang, J., Witsenboer, H.M.A., Zhao, S., Li, Z., Zhang, A., Wang, D. and**  
455 **Liang, C.** (2018) Genome sequence of the progenitor of wheat A subgenome *Triticum urartu*. *Nature.*  
456 **557**, 424-428.
- 457 **Liu, Z., Yan, L., Wu, Z., Mei, C., Lu, K., Yu, Y., Liang, S., Zhang, X., Wang, X. and Zhang, D.** (2012)  
458 Cooperation of three WRKY-domain transcription factors WRKY18, WRKY40, and WRKY60 in  
459 repressing two ABA-responsive genes *ABI4* and *ABI5* in *Arabidopsis*. *Journal of Experimental Botany.*  
460 **63**, 6371-6392.
- 461 **Long, X.Y., Wang, J.R., Ouellet, T., Rocheleau, H., Wei, Y.M., Pu, Z.E., Jiang, Q.T., Lan, X.J. and Zheng,**  
462 **Y.L.J.P.M.B.** (2010) Genome-wide identification and evaluation of novel internal control genes for  
463 Q-PCR based transcript normalization in wheat. **74**, p.307-311.
- 464 **Lopez-Molina, L., Mongrand, S., McLachlin, D.T., Chait, B.T. and Chua, N.H.** (2002) *ABI5* acts  
465 downstream of *ABI3* to execute an ABA-dependent growth arrest during germination. *Plant J.* **32**,  
466 317-328.
- 467 **Luo, M.C., Gu, Y.Q., Puiu, D., Wang, H., Twardziok, S.O., Deal, K.R., Huo, N., Zhu, T., Wang, L., Wang,**  
468 **Y., McGuire, P.E., Liu, S., Long, H., Ramasamy, R.K., Rodriguez, J.C., Van, S.L., Yuan, L., Wang, Z., Xia,**  
469 **Z., Xiao, L., Anderson, O.D., Ouyang, S., Liang, Y., Zimin, A.V., Perlea, G., Qi, P., Bennetzen, J.L., Dai,**  
470 **X., Dawson, M.W., Müller, H.G., Kugler, K., Rivarola-Duarte, L., Spannagl, M., Mayer, K.F.X., Lu, F.H.,**  
471 **Bevan, M.W., Leroy, P., Li, P., You, F.M., Sun, Q., Liu, Z., Lyons, E., Wicker, T., Salzberg, S.L., Devos,**  
472 **K.M. and Dvořák, J.** (2017) Genome sequence of the progenitor of the wheat D genome *Aegilops*  
473 *tauschii*. *Nature.* **551**, 498-502.
- 474 **Mares DJ, Mrva K, Cheong J, Williams K, Watson B, Storlie E, Sutherland M, Zou Y.** (2005) A QTL  
475 located on chromosome 4A associated with dormancy in white- and red-grained wheats of diverse  
476 origin. *Theor Appl Genet.* **111**, 1357-1364
- 477 **McCarty, D.R., Hattori, T., Carson, C.B., Vasil, V., Lazar, M. and Vasil, I.K.** (1991) The Viviparous-1  
478 developmental gene of maize encodes a novel transcriptional activator. *Cell.* **66**, 895-905.
- 479 **Ming, R., Vanburen, R., Liu, Y., Mei, Y. and Shen-Miller, J.J.G.B.** (2013) Genome of the long-living  
480 sacred lotus (*Nelumbo nucifera Gaertn.*). **14**, R41.
- 481 **Motomura, Y., Kobayashi, F., Iehisa, J.C.M. and Takumi, S.** (2013) A major quantitative trait locus for  
482 cold-responsive gene expression is linked to frost-resistance gene *Fr-A2* in common wheat. *Breeding*

- 483 *science*. **63**, 58-67.
- 484 **Munkvold, J.D., Tanaka, J., Benscher, D.** (2009) Mapping quantitative trait loci for preharvest  
485 sprouting resistance in white wheat. *Theor Appl Genet*. **119**, 1223–1235.
- 486 **Niu, X., Helentjaris, T. and Bate, N., J** (2002) Maize ABI4 binds coupling element1 in abscisic acid and  
487 sugar response genes. *Plant Cell*. **14**, 2565-2575.
- 488 **Olaerts, H., Roye, C., Derde, L.J., Sinnaeve, G., Meza, W.R., Bodson, B. and Courtin, C.M.** (2016)  
489 Impact of Preharvest Sprouting of Wheat (*Triticum aestivum*) in the Field on Starch, Protein, and  
490 Arabinoxylan Properties. *Journal of Agricultural and Food Chemistry*. **64**, 8324-8332.
- 491 **Pfaffl, M.W.** (2001) A new mathematical model for relative quantification in real-time RT–PCR. *Nucleic  
492 Acids Research*. **29**, e45-e45.
- 493 **Phukan, U.J., Jeena, G.S. and Shukla, R.K.** (2016) WRKY Transcription Factors: Molecular Regulation  
494 and Stress Responses in Plants. *Front Plant Sci*. **7**, 760.
- 495 **Rice, P., Longden, I. and Bleasby, A.** (2000) EMBOSS: the European Molecular Biology Open Software  
496 Suite. *Trends Genet*. **16**, 276-277.
- 497 **Rogers, S., Wells, R. and Rechsteiner, M.** (1986) Amino acid sequences common to rapidly degraded  
498 proteins: the PEST hypothesis. *Science*. **234**, 364-368.
- 499 **Sakata, Y., Nakamura, I., Taji, T., Tanaka, S. and Quatrano, R.S.** (2010) Regulation of the  
500 ABA-responsive Em promoter by *ABI3* in the moss *Physcomitrella patens*: role of the ABA response  
501 element and the RY element. *Plant Signal Behav*. **5**, 1061-1066.
- 502 **Sarkar, A.K. and Lahiri, A.** (2013) Specificity determinants for the abscisic acid response element. *FEBS  
503 Open Bio*. **3**, 101-105.
- 504 **Shang, Y., Yan, L., Liu, Z., Cao, Z., Mei, C., Xin, Q., Wu, F., Wang, X., Du, S., Jiang, T., Zhang, X., Zhao,  
505 R., Sun, H., Liu, R., Yu, Y. and Zhang, D.** (2010) The Mg-chelatase H subunit of *Arabidopsis* antagonizes  
506 a group of WRKY transcription repressors to relieve ABA-responsive genes of inhibition. *The Plant cell*.  
507 **22**, 1909-1935.
- 508 **Shu, K., Liu, X.D., Xie, Q. and He, Z.H.** (2016) Two Faces of One Seed: Hormonal Regulation of  
509 Dormancy and Germination. *Mol Plant*. **9**, 34-45.
- 510 **Shu, K., Zhang, H., Wang, S., Chen, M., Wu, Y., Tang, S., Liu, C., Feng, Y., Cao, X. and Xie, Q.** (2013)  
511 *ABI4* regulates primary seed dormancy by regulating the biogenesis of abscisic acid and gibberellins in  
512 *arabidopsis*. *PLoS Genet*. **9**, e1003577.
- 513 **Soderman, Brocard, Lynch and Physiology, R.J.P.** (2000) Regulation and function of the *Arabidopsis*  
514 ABA-insensitive4 gene in seed and abscisic acid response signaling networks.
- 515 **Sun, G., Zhang, X. and Xiao, S.** (2005) Maternal effect on sensitivity of embryo to ABA and grain  
516 dormancy in wheat. *Journal of Triticeae Crops*. **25**, 37-41.
- 517 **Theodorsson-Norheim, E.** (1986) Kruskal-Wallis test: BASIC computer program to perform  
518 nonparametric one-way analysis of variance and multiple comparisons on ranks of several  
519 independent samples. *Comput Methods Programs Biomed*. **23**, 57-62.
- 520 **Torada A, Ikeguchi S, Koike M.** (2005) Mapping and validation of PCR-based markers associated with a  
521 major QTL for seed dormancy in wheat. *Euphytica*. **143**, 251–255
- 522 **Wang, L., K, L., S, M., Z, L., Y, L., J, W., Y, L., Y, W. and Y, Z.** (2015) Large-scale screening for *Aegilops*  
523 *tauschii* tolerant genotypes to phosphorus deficiency at seedling stage. *Euphytica*. **204**, 571-586.
- 524 **Wang S, Basten C J.** (2007) Windows QTL cartographer 2.5. *Department of statistics*, North Carolina  
525 state university, Raleigh, NC
- 526 **Wind, J.J., Peviani, A., Snel, B., Hanson, J. and Smeekens, S.C.J.T.i.P.S.** (2013) *ABI4*: versatile activator

- 527 and repressor. **18**, 125-132.
- 528 **Yang, J., Tan, C., Lang, J., Tang, H., Hao, M., Tan, Z., Yu, H., Zhou, Y., Liu, Z., Li, M., Zhou, Y., Cheng, M.,**  
529 **Zhang, L., Liu, D. and Wang, J.** (2019) Identification of *qPHS.sicau-1B* and *qPHS.sicau-3D* from  
530 synthetic wheat for pre-harvest sprouting resistance wheat improvement. *Molecular Breeding*. **39**,  
531 132.
- 532 **Yang, J. , Liu, Y. , Pu, Z. , Zhang, L. , Yuan, Z. , Chen, G.** (2014) Molecular characterization of high pi  
533  $\alpha$ -amylase and its expression qtl analysis in synthetic wheat rils. *Molecular Breeding*. **34**(3), 1075-1085.
- 534 **Yu, J., Hu, S., Wang, J., Wong, G.K., Li, S., Liu, B., Deng, Y., Dai, L., Zhou, Y., Zhang, X., Cao, M., Liu, J.,**  
535 **Sun, J., Tang, J., Chen, Y., Huang, X., Lin, W., Ye, C., Tong, W., Cong, L., Geng, J., Han, Y., Li, L., Li, W.,**  
536 **Hu, G., Huang, X., Li, W., Li, J., Liu, Z., Li, L., Liu, J., Qi, Q., Liu, J., Li, L., Li, T., Wang, X., Lu, H., Wu, T.,**  
537 **Zhu, M., Ni, P., Han, H., Dong, W., Ren, X., Feng, X., Cui, P., Li, X., Wang, H., Xu, X., Zhai, W., Xu, Z.,**  
538 **Zhang, J., He, S., Zhang, J., Xu, J., Zhang, K., Zheng, X., Dong, J., Zeng, W., Tao, L., Ye, J., Tan, J., Ren,**  
539 **X., Chen, X., He, J., Liu, D., Tian, W., Tian, C., Xia, H., Bao, Q., Li, G., Gao, H., Cao, T., Wang, J., Zhao,**  
540 **W., Li, P., Chen, W., Wang, X., Zhang, Y., Hu, J., Wang, J., Liu, S., Yang, J., Zhang, G., Xiong, Y., Li, Z.,**  
541 **Mao, L., Zhou, C., Zhu, Z., Chen, R., Hao, B., Zheng, W., Chen, S., Guo, W., Li, G., Liu, S., Tao, M.,**  
542 **Wang, J., Zhu, L., Yuan, L. and Yang, H.** (2002) A draft sequence of the rice genome (*Oryza sativa* L. ssp.  
543 *indica*). *Science*. **296**, 79-92.
- 544 **Zhang, L., Wang, B., Pan, L. and Peng, J.** (2013) Recycling isolation of plant DNA, a novel method. *J*  
545 *Genet Genomics*. **40**, 45-54.
- 546 **Zhang, Y., Zhao, F. and zhao, j.** (2005) Effects of Exogenous ABA on the Seed Germination of Rice  
547 (*Oryza sativa* L.) and the Expression of Relative Genes. *Journal of Wuhan Botanical Research/Plant*  
548 *Science Journal*. **23**.
- 549 **Zhao, S., Ye, Z. and Stanton, R.** (2020) Misuse of RPKM or TPM normalization when comparing across  
550 samples and sequencing protocols. *RNA*, rna.074922.074120.
- 551 **Zhou, K., Yang, J., Wang, Z. and Wang, J.** (2016) Sequence analysis and expression profiles of *TaABI5*, a  
552 pre-harvest sprouting resistance gene in wheat. *Genes & Genomics*. **39**, 161-171.
- 553 **Zhu, T., Wang, L., Rodriguez, J.C., Deal, K.R., Avni, R., Distelfeld, A., McGuire, P.E., Dvorak, J. and Luo,**  
554 **M.C.** (2019) Improved Genome Sequence of Wild Emmer Wheat Zavitan with the Aid of Optical Maps.  
555 *G3 (Bethesda)*. **9**, 619-624.

556

## 557 **Figure Legend**

558 **Figure 1.** The alignment of *ABI4* proteins of Chinese Spring and wheat ancestors.  
559 Sequences including *TaABI4-1A/TaABI4-1B/TaABI4-1D* from Chinese Spring,  
560 *TdABI4-1A*, and *TdABI4-1B* from *T. dicoccoides* cv. Zavitan, *TuABI4-1A* from *T.*  
561 *Urartu*, and *AetABI4-1D* from *Ae. tauschii*. The AP2 region was indicated by red lines  
562 at the bottom, LRP and AP2-associated-like motifs were boxed.

563 **Figure 2.** Protein structure schematic diagram of *ABI4* in wheat cultivars. Grey boxes  
564 indicate polymorphism of amino acid sequences and black boxes were highly  
565 conserved Amino Acid sequences. Boxes filled with twill were conserved domains  
566 and motifs, and boxes filled with dots were potential PEST motifs.



567 **Figure 3.** Potential *cis*-acting regulatory elements in upstream regions of *ABI4* genes  
568 from wheat and wheat ancestors. Colored boxes represent different *cis*-regulatory  
569 elements.

570 **Figure 4.** Schematic representation of conserved *cis*-motifs (obtained using MEME)  
571 in upstream regions of *ABI4* genes from wheat cultivars. Different motifs were  
572 represented by boxes of different colors.

573 **Figure 5.** The expression pattern of *TaABI4* in SHW-L1 and CM32. (A) the  
574 expression assays using RNAseq. The y-axis denotes TPM (Transcripts Per Kilobase  
575 Million). (B) the expression assays using qRT-PCR.

576 **Figure 6.** eQTL genetic locations in the genetic map. The size of the circles means  
577 LOD values. The x-axis denotes different chromosomes.

578

## 579 **Tables**

580 **Table 1.** Conservation of putative PEST sequences in *ABI4* proteins from wheat  
581 cultivars.

582 **Table 2.** Conserved *cis*-motifs found in upstream promoter regions of *ABI4* genes in  
583 wheat cultivars. llr means log-likelihood ratio.

584 **Table 3.** eQTL mapping results of *TaABI4* in SHW-L1 and CM32.

585

## 586 **Supplementary Materials.**

587 **Table S1.** Currently available wheat genome assemblies for varieties different to the  
588 reference Chinese Spring landrace and wheat ancestors. (file type: MS Word  
589 document; file size: 19kb)

590 **Table S2.** Primers used for amplification and expressional profile assay of *TaABI4*.  
591 (file type: MS Word document; file size: 16kb)

592 **Figure S1.** The alignment of coding sequences including *TaABI4-1A*, *TaABI4-1B* and  
593 *TaABI4-1D* in Chinese Spring. (file type: PDF; file size: 58kb)

594 **Figure S2.** The alignment of coding sequences including *TaABI4-1A*, *TaABI4-1B* and  
595 *TaABI4-1D* in SHW-L1 and CM32. (file type: PDF; file size: 77kb)

596

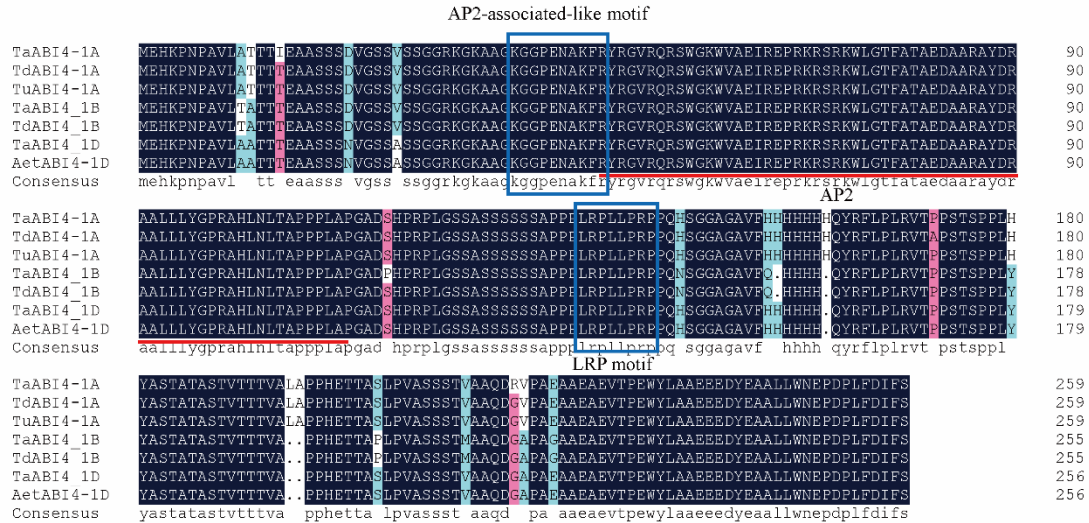

597

598 **Figure 1.** The alignment of *ABI4* proteins of Chinese Spring and wheat ancestors.  
 599 Sequences including *TaABI4-1A/TaABI4-1B/TaABI4-1D* from Chinese Spring,  
 600 *TdABI4-1A*, and *TdABI4-1B* from *T. dicoccoides* cv. Zavitan, *TuABI4-1A* from *T.*  
 601 *Urartu*, and *AetABI4-1D* from *Ae. tauschii*. The AP2 region was indicated by red lines  
 602 at the bottom, LRP and AP2-associated-like motifs were boxed.

603

604

605

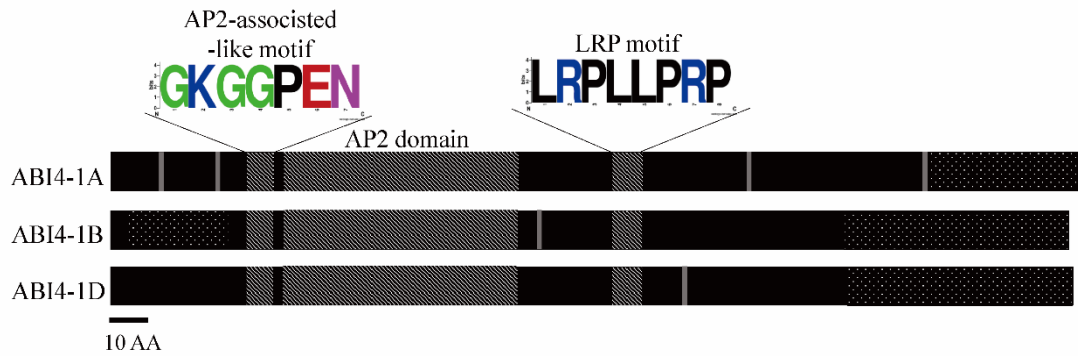

606

607 **Figure 2.** Protein structure schematic diagram of ABI4 in wheat cultivars. Grey boxes

608 indicate polymorphism of amino acid sequences and black boxes were highly

609 conserved Amino Acid sequences. Boxes filled with twill were conserved domains

610 and motifs, and boxes filled with dots were potential PEST motifs.

611

612

613

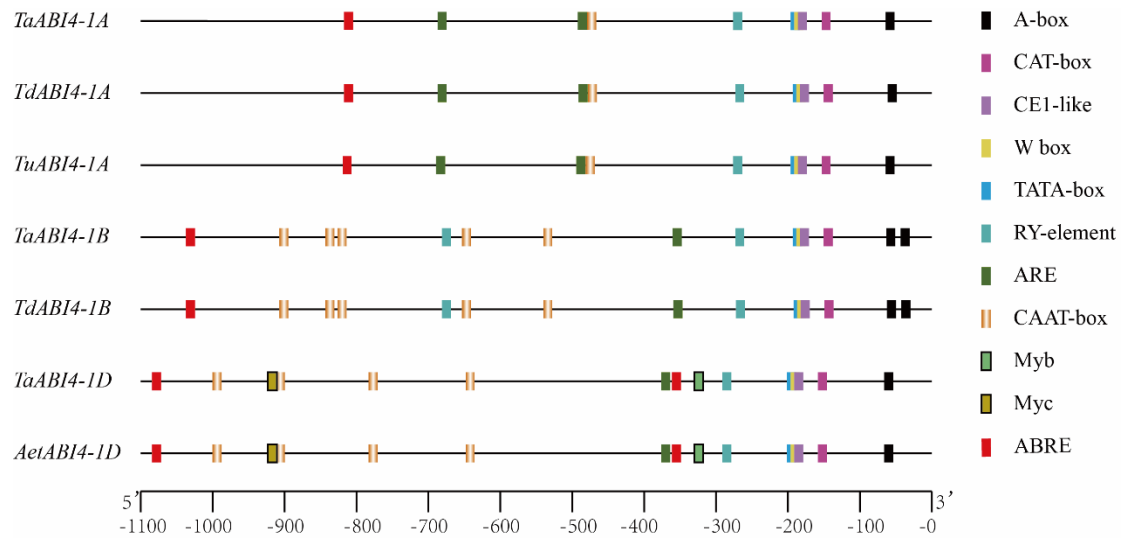

**Figure 3.** Potential *cis*-acting regulatory elements in upstream regions of *ABI4* genes from wheat and wheat ancestors. Coloured boxes represent different *cis*-regulatory elements.

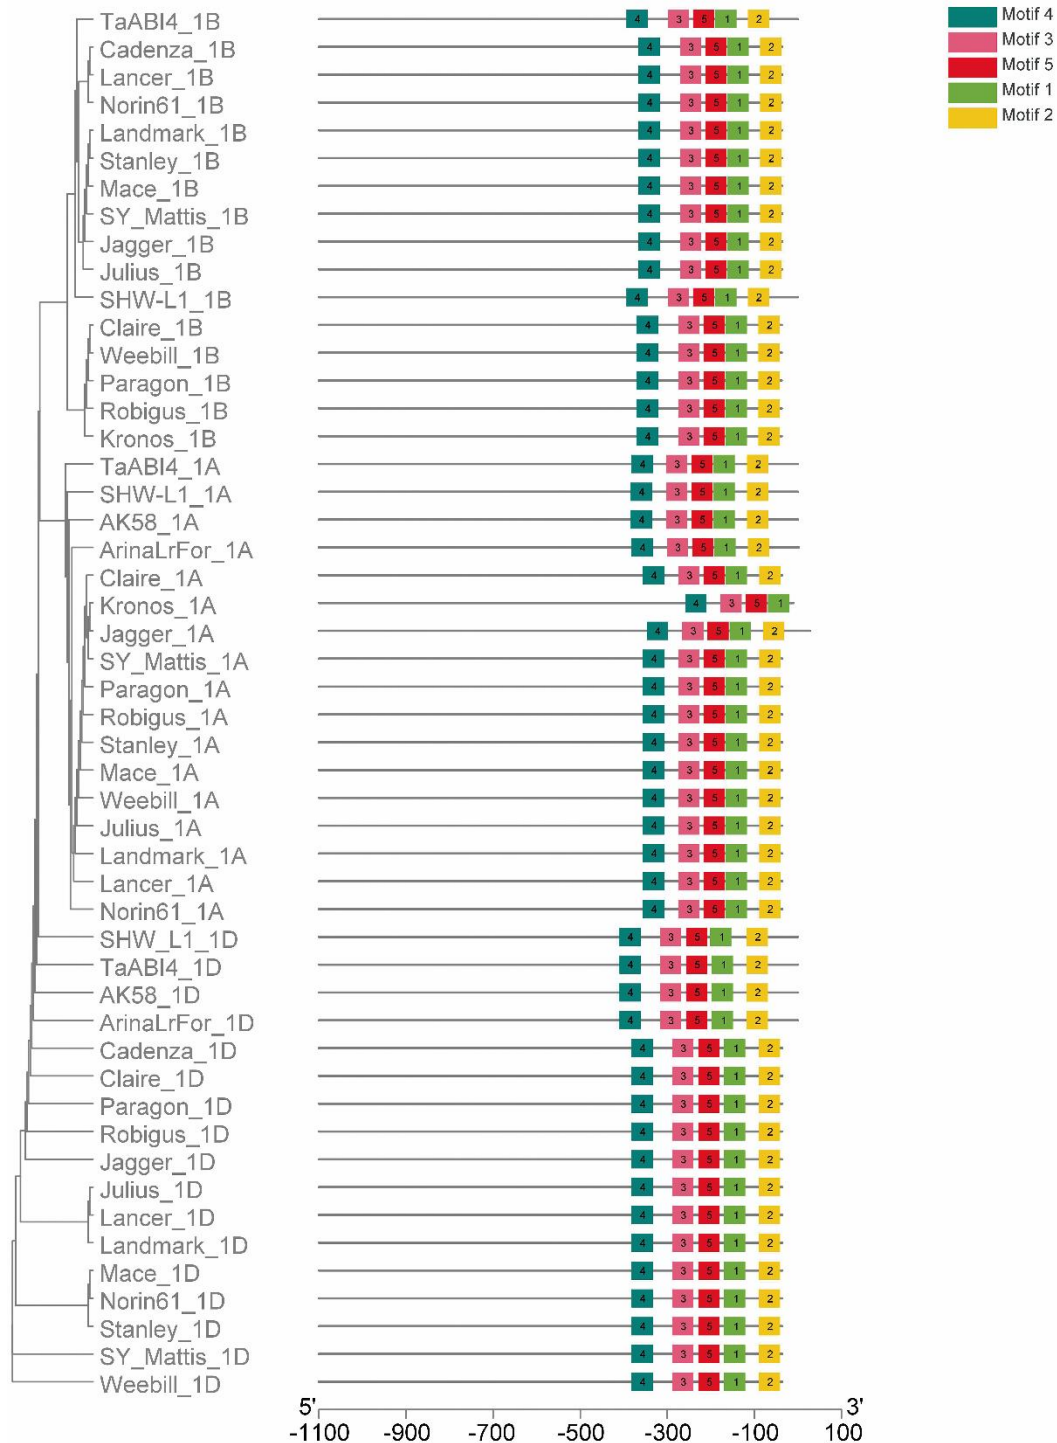

620

621 **Figure 4.** Schematic representation of conserved *cis*-motifs (obtained using MEME)  
622 in upstream regions of *ABI4* genes from wheat cultivars. Different motifs were  
623 represented by boxes of different colours.

624

625

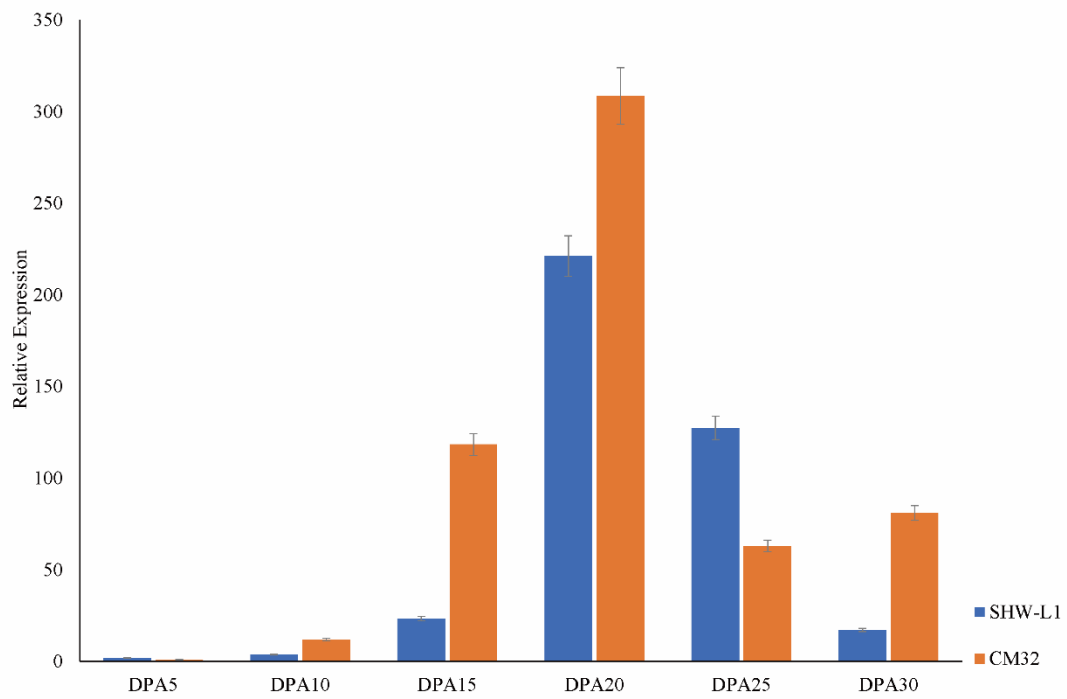

626

627

628

**Figure 5.** The expression pattern of *TaABI4* in SHW-L1 and CM32.

629

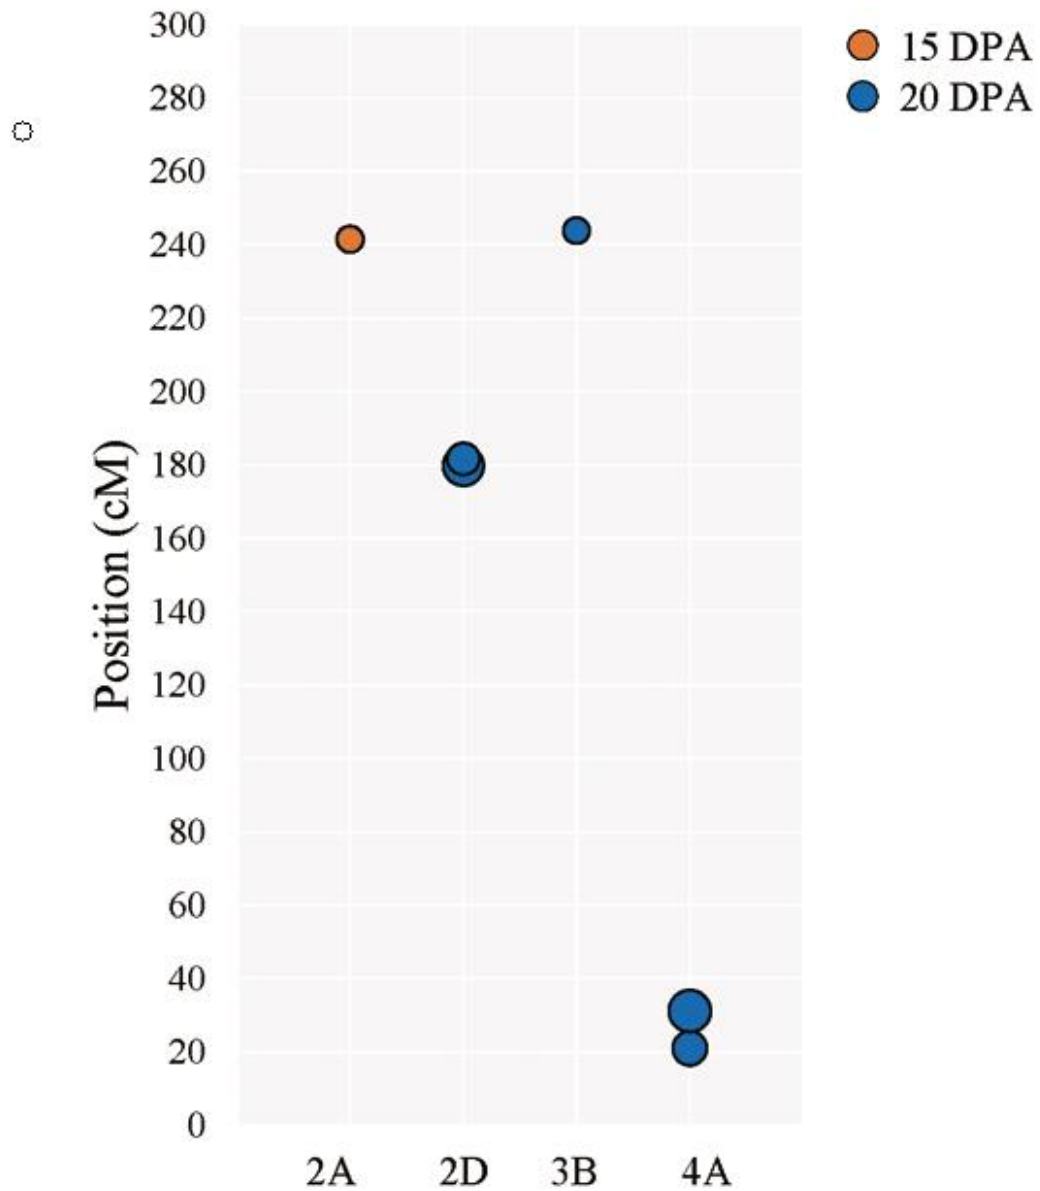

630

631

632

633

**Figure 6.** eQTL genetic locations in the genetic map. The size of the circles means LOD values. The x-axis denotes different chromosomes.

634 **Table 1.** Conservation of putative PEST sequences in ABI4 proteins from wheat  
 635 cultivars.

| Name    | Length | Score value | Position (N/C termini) | Identity | Motif logo |
|---------|--------|-------------|------------------------|----------|------------|
| ABI4-1A | 21AA   | 0.44        | 219-260(C)             | 99.8%    |            |
| ABI4-1B | 20AA   | 2.08        | 196-256(C)             | 100%     |            |
|         |        | 3.52        | 4-32(N)                | 100%     |            |
| ABI4-1D | 19AA   | 3.13        | 197-257(C)             | 100%     |            |

636

637



638 **Table 2.** Conserved *cis*-motifs found in upstream promoter regions of *ABI4* genes in  
 639 wheat cultivars. llr means log likelihood ratio.

| MEME-generated motifs                                  | llr  | E-Value   | Identity | Core elements | Motif Logo                                                                                    |
|--------------------------------------------------------|------|-----------|----------|---------------|-----------------------------------------------------------------------------------------------|
| GCCCTTTATATTTGACCACCGCCCCTCT<br>CCACCAAGCACATCCTCCTCGG | 3736 | 5.0e-1093 | 100.0%   | WBOX          | motif1<br> |
| TCTTCATCGGTCTCCCCAACGCACAGC<br>GAGTAGGTATCCCTCTCTCTTC  | 3690 | 7.9e-1098 | 99.4%    | Novel motif   | motif2<br> |
| TACCTGCATGAGAGCATGACCTTTCAC<br>TGCATTGCATGCATGTCCGTTC  | 3753 | 1.2e-1100 | 98.0%    | WBOX          | motif3<br> |
| TAAACAAGCAGAAAACGTAGGCACA<br>TCGCTACAGAAGATAAACACGCC   | 3705 | 3.6e-1081 | 97.1 %   | MYB1AT        | motif4<br> |
| TCTCTCACTCACTCACTCCTGCTCGCTG<br>TACTCCACTGTGCACGCTCTCT | 3465 | 2.6e-986  | 95.0%    | CACTFTPPCA1   | motif5<br> |

640

641

642 **Table 3.** eQTL mapping results of *TaABI4* in SHW-L1 and CM32.

| eQTLs                    | Chr. | Position(cM) | LOD   | Flanking markers |              | Additive | R <sup>2</sup> | Phenotype | Physical location (bp) |
|--------------------------|------|--------------|-------|------------------|--------------|----------|----------------|-----------|------------------------|
| <i>eQABI4.15DPA.2A.1</i> | 2A   | 241.49       | 4.53  | AX-111636801     | AX-110609678 | -6.4226  | 0.223          | 15DAP     | 48661724-48805480      |
| <i>eQABI4.20DPA.2D.1</i> | 2D   | 179.81       | 9.63  | AX-108856494     | AX-110515525 | -9.3612  | 0.382          | 20DAP     | 613440336-616018344    |
| <i>eQABI4.20DPA.2D.2</i> | 2D   | 181.66       | 6.38  | AX-110515525     | AX-111690676 | -8.8654  | 0.348          | 20DAP     | 616018344-618242947    |
| <i>eQABI4.20DPA.3B.1</i> | 3B   | 243.92       | 4.34  | AX-110503866     | AX-95660238  | -4.9156  | 0.107          | 20DAP     | 667902308-669428443    |
| <i>eQABI4.20DPA.4A.1</i> | 4A   | 20.97        | 7.16  | AX-110465181     | AX-86175059  | -8.5772  | 0.382          | 20DAP     | 104670825-140756768    |
| <i>eQABI4.20DPA.4A.2</i> | 4A   | 31.15        | 10.59 | AX-109911754     | AX-110113739 | -9.5375  | 0.461          | 20DAP     | 89088986-103724030     |

643

644

645 **Table 4.** Candidate genes expressed in seeds and ABA related genes near eQTL  
646 interval

| Gene ID            | Orthologues         |                   | Description in Wheat Gmap                          |
|--------------------|---------------------|-------------------|----------------------------------------------------|
|                    | Species             | Gene name         |                                                    |
| TraesCS2B02G600800 | <i>Ae. tauschii</i> | <i>GH3.3</i>      | GH3 auxin-responsive promoter                      |
| TraesCS2B02G601300 | <i>Ae. tauschii</i> | <i>PUB23-like</i> | protein ubiquitination                             |
| TraesCS2B02G602000 | <i>Ae. tauschii</i> | <i>TMK1</i>       | protein phosphorylation                            |
| TraesCS2B02G603000 | <i>A. thaliana</i>  | <i>NHL12</i>      | Late embryogenesis abundant protein, <i>LEA-14</i> |
| TraesCS2B02G603100 | <i>A. thaliana</i>  | <i>NHL10</i>      | Late embryogenesis abundant protein, <i>LEA-14</i> |
| TraesCS2B02G603200 | <i>A. thaliana</i>  | <i>NHL10</i>      | Late embryogenesis abundant protein, <i>LEA-14</i> |

647
